# Supplementary material for: The Prevalence of Small for Gestational Age and Extrauterine Growth Restriction among Extremely and Very Preterm Neonates, Using Different Growth Curves, and Its Association with Clinical and Nutritional Factors
Source: MDPI journal article supplement (doi:10.3390/nu15153290), 2023-07-25
Supplement: s1 [file s1]

**Supplementary Table S1.** Associations\* of perinatal, clinical and nutritional factors with weight at discharge z scores based on the Fenton2013 and INTERGROWTH-21st weight growth references, stratified by year of hospitalization (before or after 2018)

|                              | Before 2018 (n=274)            |                                      | After 2018 (n=163)             |                                      |
|------------------------------|--------------------------------|--------------------------------------|--------------------------------|--------------------------------------|
|                              | Fenton2013<br>$\beta$ (95% CI) | INTERGROWTH-21st<br>$\beta$ (95% CI) | Fenton2013<br>$\beta$ (95% CI) | INTERGROWTH-21st<br>$\beta$ (95% CI) |
| <b>Perinatal factors</b>     |                                |                                      |                                |                                      |
| Extremely preterm            | 0.58 (0.19,0.96)               | 0.43 (0.03,0.83)                     | 0.64 (0.08,1.20)               | 0.73 (0.12,1.33)                     |
| BW z score                   | 0.29 (0.16,0.41)               | 0.40 (0.27,0.53)                     | 0.51 (0.34,0.68)               | 0.49 (0.33,0.65)                     |
| Hospitalization (days)       | -0.04 (-0.05,-0.03)            | -0.04 (-0.05,-0.03)                  | -0.04 (-0.05,-0.03)            | -0.03 (-0.04,-0.02)                  |
| <b>Nutritional factors</b>   |                                |                                      |                                |                                      |
| PN duration (days)           | 0.01 (-0.01,0.02)              | 0.01 (-0.01,0.03)                    | 0.01 (-0.00,0.03)              | 0.00 (-0.01,0.02)                    |
| EN initiation (days)         | -0.03 (-0.07,0.01)             | -0.04 (-0.08,0.00)                   | -0.07 (-0.15,0.02)             | -0.08 (-0.17,0.01)                   |
| Full EN achieved (days)      | -0.01 (-0.03,0.00)             | -0.02 (-0.04,0.00)                   | -0.02 (-0.05,0.00)             | -0.02 (-0.05,0.00)                   |
| <b>Clinical factors</b>      |                                |                                      |                                |                                      |
| BPD                          | 0.47 (-0.08,1.02)              | 0.61 (0.04,1.17)                     | 0.12 (-0.38,0.62)              | 0.24 (-0.29,0.78)                    |
| Late-onset Sepsis            | -0.03 (-0.32,0.27)             | -0.08 (-0.38,0.22)                   | -0.15 (-0.52,0.22)             | -0.22 (-0.62,0.17)                   |
| Anemia                       | 0.42 (0.11,0.73)               | 0.36 (0.04,0.67)                     | 0.26 (-0.10,0.63)              | 0.27 (-0.13,0.66)                    |
| hsPDA                        | -0.04 (-0.51,0.43)             | -0.02 (-0.50,0.47)                   | -0.85 (-1.36,-0.34)            | -0.77 (-1.31,-0.23)                  |
| ROP                          | 0.38 (-0.29,1.06)              | 0.37 (-0.33,1.07)                    | 0.04 (-0.63,0.71)              | -0.02 (-0.74,0.69)                   |
| Respiratory support (days)   | 0.00 (-0.02,0.01)              | 0.00 (-0.02,0.01)                    | 0.02 (-0.00,0.04)              | 0.01 (-0.01,0.04)                    |
| Oxygen administration (days) | 0.01 (-0.00,0.02)              | 0.01 (-0.00,0.02)                    | -0.01 (-0.03,0.01)             | -0.01 (-0.03,0.01)                   |

Abbreviations: SGA, small for gestational age; PN, parenteral nutrition; EN, enteral nutrition; BPD, bronchopulmonary dysplasia; hsPDA, hemodynamically significant patent ductus arteriosus; ROP, retinopathy of prematurity ( $\geq$  Stage II); cystic PVL, cystic periventricular leukomalacia. \* Beta coefficients ( $\beta$ ) corresponding confidence intervals (CI) obtained using linear regression models, respectively.

**Supplementary Table S2.** Associations\* of perinatal, clinical and nutritional factors with extrauterine growth restriction, based on the Fenton2013 and INTERGROWTH-21<sup>st</sup> weight growth references, stratified by year of hospitalization (before or after 2018)

|                              | Before 2018 (n=274)       |                                 | After 2018 (n=163)        |                                 |
|------------------------------|---------------------------|---------------------------------|---------------------------|---------------------------------|
|                              | Fenton2013<br>OR (95% CI) | INTERGROWTH-21st<br>OR (95% CI) | Fenton2013<br>OR (95% CI) | INTERGROWTH-21st<br>OR (95% CI) |
| <b>Perinatal factors</b>     |                           |                                 |                           |                                 |
| Extremely preterm            | 0.84 (0.25,2.84)          | 0.69 (0.20,2.32)                | 0.01 (0.00,0.23)          | 0.14 (0.01,1.70)                |
| BW z score                   | 0.20 (0.11,0.34)          | 0.19 (0.11,0.34)                | 0.12 (0.05,0.27)          | 0.29 (0.16,0.51)                |
| Hospitalization (days)       | 1.07 (1.04,1.10)          | 1.08 (1.05,1.12)                | 1.08 (1.03,1.13)          | 1.06 (1.02,1.10)                |
| <b>Nutritional factors</b>   |                           |                                 |                           |                                 |
| PN duration (days)           | 0.97 (0.91,1.02)          | 0.95 (0.89,1.01)                | 1.17 (1.00,1.37)          | 1.11 (0.99,1.26)                |
| EN initiation (days)         | 1.09 (0.97,1.22)          | 1.23 (1.08,1.40)                | 1.24 (0.97,1.58)          | 1.25 (0.96,1.64)                |
| Full EN achieved (days)      | 1.08 (1.03,1.14)          | 1.04 (0.99,1.10)                | 0.90 (0.77,1.05)          | 0.94 (0.84,1.05)                |
| <b>Clinical factors</b>      |                           |                                 |                           |                                 |
| BPD                          | 0.56 (0.12,2.64)          | 0.57 (0.11,3.01)                | 1.30 (0.22,7.77)          | 2.10 (0.33,13.44)               |
| Late-onset Sepsis            | 1.99 (0.82,4.82)          | 2.49 (1.00,6.20)                | 0.34 (0.08,1.47)          | 3.07 (0.77,12.31)               |
| Anemia                       | 0.30 (0.12,0.77)          | 0.32 (0.11,0.92)                | 0.62 (0.18,2.16)          | 0.90 (0.20,4.10)                |
| hsPDA                        | 1.45 (0.29,7.39)          | 0.48 (0.10,2.31)                | 7.36 (1.21,44.84)         | 2.83 (0.49,16.43)               |
| ROP                          | 0.20 (0.02,1.73)          | 0.10 (0.01,1.13)                | na                        | 7.10 (0.53,94.91)               |
| Respiratory support (days)   | 0.99 (0.94,1.04)          | 1.02 (0.97,1.06)                | 0.97 (0.90,1.05)          | 0.99 (0.92,1.07)                |
| Oxygen administration (days) | 0.97 (0.93,1.01)          | 0.98 (0.94,1.02)                | 1.04 (0.98,1.12)          | 0.99 (0.93,1.05)                |

Abbreviations: SGA, small for gestational age; PN, parenteral nutrition; EN, enteral nutrition; BPD, bronchopulmonary dysplasia; hsPDA, hemodynamically significant patent ductus arteriosus; ROP, retinopathy of prematurity ( $\geq$  Stage II); cystic PVL, cystic periventricular leukomalacia. \* Odds ratios (OR) and corresponding confidence intervals (CI) obtained using logistic regression models, respectively.
